# Supplementary material for: Seasonal Shifts in Bacterial and Fungal Microbiomes of Leaves and Associated Leaf-Mining Larvae Reveal Persistence of Core Taxa Regardless of Diet
Source: PubMed Central journal article supplement (PMC9927363; doi:10.1128/spectrum.03160-22), 2023-01-11
Supplement: spectrum.03160-22-s0001.pdf [file spectrum.03160-22-s0001.pdf]

## **Supplementary Information for**

### **Seasonal shifts in bacterial and fungal microbiomes of leaves and associated leaf mining larvae reveal persistence of core taxa regardless of diet**

Authors: Hana Šigutová, Martin Šigut, Petr Pyszko, Martin Kostovčík, Miroslav Kolařík and Pavel Drozd

Corresponding author: Hana Šigutová

Email: hana.sigutova@osu.cz

#### **This file includes:**

Figures S1 to S6

Tables S1, S2, S5, and S6

#### **Other supplementary materials for this manuscript are uploaded separately, and include the following:**

Figure S7 (hierarchical taxonomic composition of the leaf and larval bacterial microbiota throughout the season)

Figure S8 (hierarchical taxonomic composition of the leaf and larval fungal microbiota throughout the season)

Table S3 (contaminant bacterial and fungal ASVs)

Table S4 (bacterial and fungal taxa, the number of reads, and the variables entering the analyses)

**Fig. S1.** Map of **a)** Czechia showing the sampling locality at Central Moravia (Střeň in PLA Litovelské Pomoraví); **b)** sampling plots with individual trees. Map backgrounds were taken from the website FreeWorldMaps.net (<https://www.freeworldmaps.net/europe/czechia/czechia-physical-map.jpg>) and Mapy.cz (<https://mapy.cz/zakladni>).

**a)**

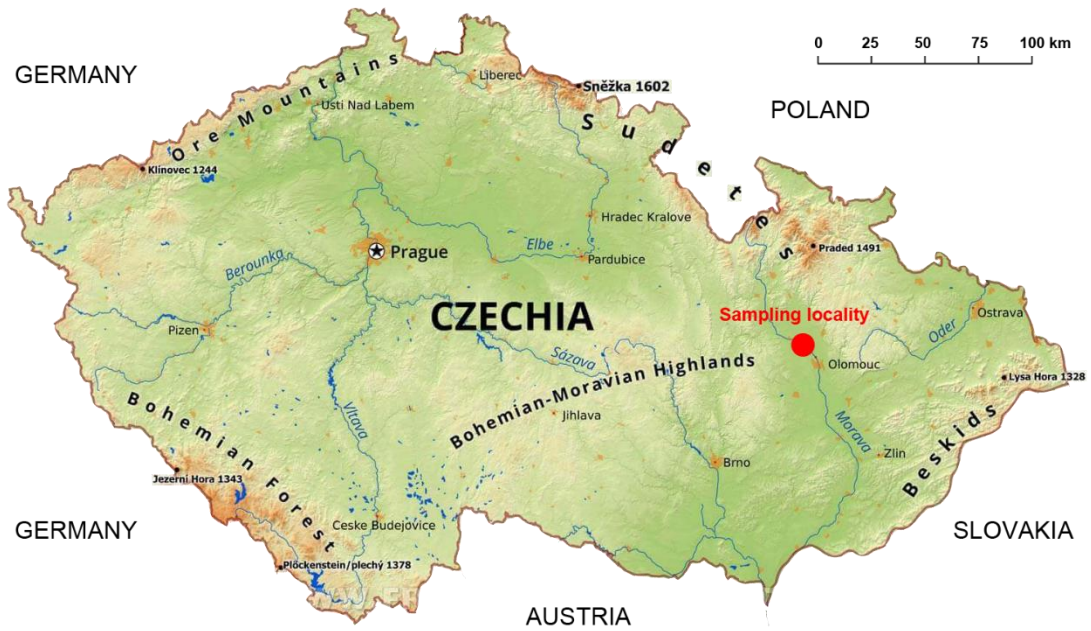

**b)**

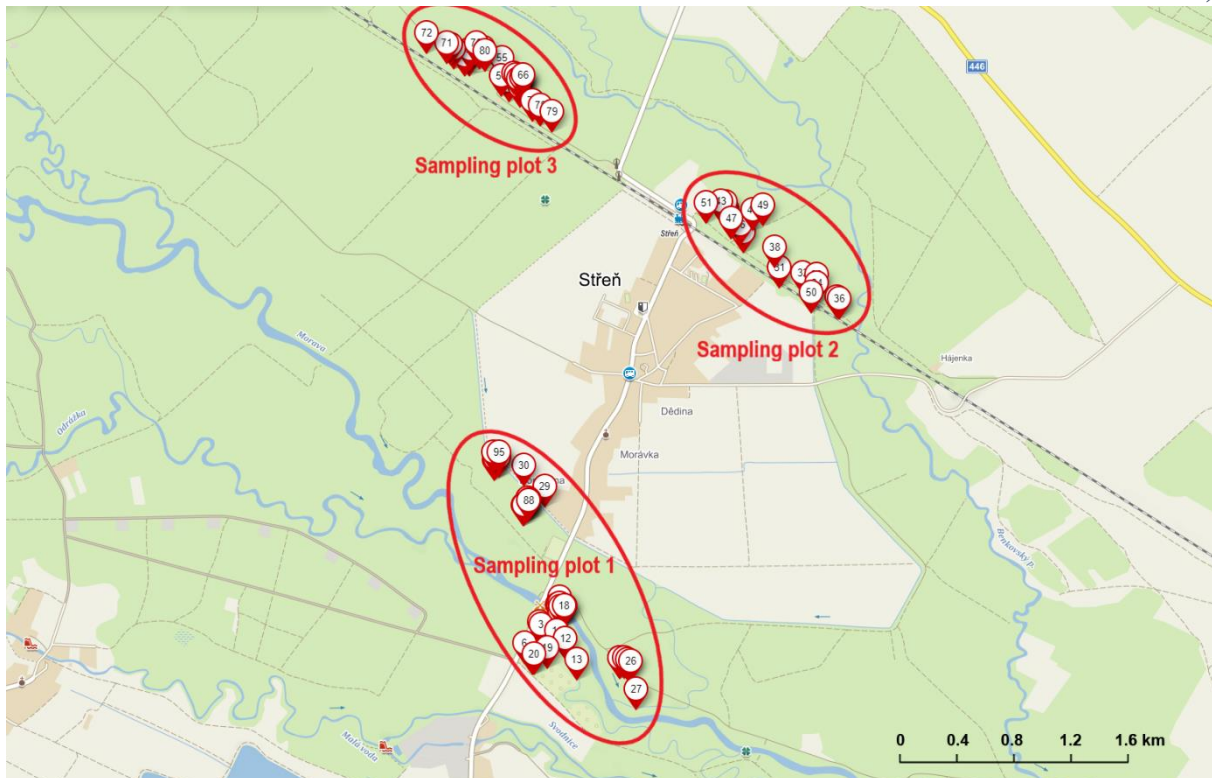

**Table S1.** Number of leaf-miners and host tree species sampled on individual sampling events.

| Type         | Order       | Family | Species                                             | Host tree                                | Sampling event |      |        |         | Total |
|--------------|-------------|--------|-----------------------------------------------------|------------------------------------------|----------------|------|--------|---------|-------|
|              |             |        |                                                     |                                          | April          | June | August | October |       |
| M            | Lepidoptera | G      | <i>Phyllonorycter</i> sp.*                          |                                          |                | 1    | 6      | 1       | 8     |
| M            | Lepidoptera | G      | <i>Phyllonorycter coryli</i> (Nicelli, 1851)        | <i>Corylus avellana</i>                  |                | 10   | 9      | 8       | 27    |
| M            | Lepidoptera | G      | <i>Phyllonorycter esperella</i> (Goeze, 1783)       | <i>Carpinus betulus</i>                  |                | 10   | 12     | 9       | 31    |
| M            | Lepidoptera | G      | <i>Phyllonorycter heegeriella</i> (Zeller, 1846)    | <i>Quercus robur</i> , <i>Q. petraea</i> |                | 1    |        | 22      | 23    |
| M            | Lepidoptera | G      | <i>Phyllonorycter klemannella</i> (Fabricius, 1781) | <i>Alnus glutionsa</i>                   |                |      | 10     | 5       | 15    |
| M            | Lepidoptera | G      | <i>Phyllonorycter nicellii</i> (Stainton, 1851)     | <i>Corylus avellana</i>                  |                | 9    | 9      | 9       | 27    |
| M            | Lepidoptera | G      | <i>Phyllonorycter quercifoliella</i> (Zeller, 1839) | <i>Quercus robur</i> , <i>Q. petraea</i> |                | 27   | 8      | 12      | 47    |
| M            | Lepidoptera | G      | <i>Phyllonorycter rajella</i> (Linnaeus, 1758)      | <i>Alnus glutionsa</i>                   |                | 9    | 6      | 13      | 28    |
| M            | Lepidoptera | G      | <i>Phyllonorycter roboris</i> (Zeller, 1839)        | <i>Quercus robur</i> , <i>Q. petraea</i> |                | 5    | 13     |         | 18    |
| M            | Lepidoptera | G      | <i>Phyllonorycter stettinensis</i> (Nicelli, 1852)  | <i>Alnus glutionsa</i>                   |                | 9    |        |         | 9     |
| M            | Lepidoptera | G      | <i>Phyllonorycter tenerella</i> (Joannis, 1915)     | <i>Carpinus betulus</i>                  |                | 8    | 6      | 9       | 23    |
| M            | Lepidoptera | Ti     | <i>Tischeria ekebladella</i> (Bjerkander, 1795)     | <i>Quercus robur</i> , <i>Q. petraea</i> |                | 18   | 18     | 19      | 55    |
| T            | Fagales     | B      | <i>Alnus glutinosa</i> (L.) Gaertn.                 |                                          | 18             | 19   | 19     | 19      | 75    |
| T            | Fagales     | B      | <i>Carpinus betulus</i> L.                          |                                          | 18             | 18   | 18     | 18      | 72    |
| T            | Fagales     | B      | <i>Corylus avellana</i> L.                          |                                          | 18             | 20   | 18     | 18      | 74    |
| T            | Fagales     | F      | <i>Quercus petraea</i> (Matt.) Liebl.               |                                          | 18             | 18   | 18     | 18      | 72    |
| T            | Fagales     | F      | <i>Quercus robur</i> L.                             |                                          | 19             | 19   | 19     | 17      | 74    |
| <b>Total</b> |             |        |                                                     |                                          | 91             | 201  | 189    | 197     | 678   |

Type: M – leaf-miner, T – tree, Family: G – Gracillariidae, Ti – Tischeriidae, B – Betulaceae, F – Fagaceae

\*data for the individuals from *Quercus robur* sampled in low numbers (including *P. harrisella* and *P. muelleriella*) were merged and analyzed at the genus level

**Table S2.** List of taxonomic resources used for identification of leaf miners.

1. Laštůvka, Z. & Liška, J. (2010) Checklist of Lepidoptera of the Czech Republic (Insecta: Lepidoptera). URL <http://lepidoptera.wz.cz>
2. Patočka, J. (1980) Die Raupen und Puppen der Eichenschmetterlinge Mitteleuropas. Monographien zur angewandten Entomologie.
3. Ratnasingham, S. & Hebert, P. D. N. (2007) BOLD: The Barcode of Life Data System. *Molecular Ecology Notes* 7, 355–364. URL <http://barcodinglife.org>
4. De Prins, J. & De Prins, W. (2012) Global Taxonomic Database of Gracillariidae (Lepidoptera). URL <http://www.gracillariidae.net>
5. Ellis, W. N. (2007) Leafminers and plant galls of Europe, in, Zoölogisch Museum Amsterdam. URL <https://bladmineerders.nl>
6. Hering, E. M. (1957) Bestimmungstabellen der Blattminen von Europa einschliesslich des Mittelmeerbeckens und der Kanarischen Inseln., Uitgeverij Dr. W. Junk, s'Gravenhage.

**Table S5.** Explanatory variables (and their interactions) with significant effect on the composition and richness of leaf and larval microbiota. n.s. = the AIC values of their models were higher than of the null model. For leaf microbiomes, we tested the following explanatory variables: tree species, DBH, sampling height, irradiation of crown, sampling plot, and time point. For larval microbiomes, we tested all variables mentioned above plus larval species and family.

|                                | <b>Bacterial composition</b> |                                   | <b>Fungal composition</b> |                                    |
|--------------------------------|------------------------------|-----------------------------------|---------------------------|------------------------------------|
|                                | % of variability             | statistics                        | % of variability          | statistics                         |
| <b>Leaves</b>                  |                              |                                   |                           |                                    |
| <i>Tree species</i>            | 13.80                        | df = 361, F = 17.84, P = 0.001*** | 29.39                     | df = 362, F = 47.81, P = 0.001***  |
| <i>Time point</i>              | 13.33                        | df = 365, F = 68.92, P = 0.001*** | 5.13                      | df = 361, F = 33.38, P = 0.001***  |
| <i>Irradiation</i>             | 0.78                         | df = 360, F = 4.03, P = 0.001***  |                           | n.s.                               |
| <i>Sampling plot</i>           |                              | n.s.                              | 2.99                      | df = 359, F = 9.73, P = 0.001***   |
| <i>Tree species*t. point</i>   | 3.26                         | df = 356, F = 4.22, P = 0.001***  | 3.90                      | df = 355, F = 6.34, P = 0.001***   |
| <i>Tree species*s. plot</i>    |                              | n.s.                              | 5.26                      | df = 347, F = 4.28, P = 0.001***   |
| <b>Larvae</b>                  |                              |                                   |                           |                                    |
| <i>Tree species</i>            |                              | n.s.                              | 3.88                      | df = 305, F = 3.47, P = 0.001***   |
| <i>Time point</i>              | 4.66                         | df = 298, F = 18.79, P = 0.001*** | 6.82                      | df = 309, F = 24.39, P = 0.001***  |
| <i>Larval species</i>          | 17.64                        | df = 299, F = 6.46, P = 0.001***  |                           | n.s.                               |
| <i>Larval family</i>           |                              | n.s.                              | 0.55                      | df = 304, F = 1.97, P = 0.008**    |
| <i>Larval species*t. point</i> | 6.23                         | df = 288, F = 2.51, P = 0.001***  |                           | n.s.                               |
| <i>Tree species*t. point</i>   |                              | n.s.                              | 4.79                      | df = 300, F = 4.29, P = 0.001***   |
| <b>Bacterial richness</b>      |                              |                                   |                           |                                    |
| <b>Leaves</b>                  |                              |                                   |                           |                                    |
| <i>Tree species</i>            |                              | df = 362, F = 5.69, P < 0.001***  |                           | df = 362, F = 22.65, P < 0.001***  |
| <i>Time point</i>              |                              | n.s.                              |                           | df = 360, F = 22.75, P < 0.001***  |
| <i>Sampling plot</i>           |                              | n.s.                              |                           | df = 358, F = 3.62, P = 0.028*     |
| <i>Tree species*t. point</i>   |                              | n.s.                              |                           | df = 350, F = 3.23, P = 0.001**    |
| <b>Larvae</b>                  |                              |                                   |                           |                                    |
| <i>Time point</i>              |                              | df = 297, F = 17.76, P < 0.001*** |                           | df = 308, F = 140.18, P < 0.001*** |
| <i>Larval species</i>          |                              | df = 299, F = 29.07, P < 0.001*** |                           | df = 297, F = 3.91, P < 0.001***   |
| <i>Tree species</i>            |                              | n.s.                              |                           | df = 295, F = 3.89, P = 0.021*     |

**Fig. S2.** PCoA plot based on p-RDA of **a)** bacterial (df = 360, F = 32.30, P = 0.001), and **b)** fungal community composition (df = 360, F = 19.50, P = 0.001) of leaves showing significant shifts as the season progressed. Leaves were sampled at four time points; April, June, August, and October, which corresponds to young, mature, senescent, and old leaves, respectively

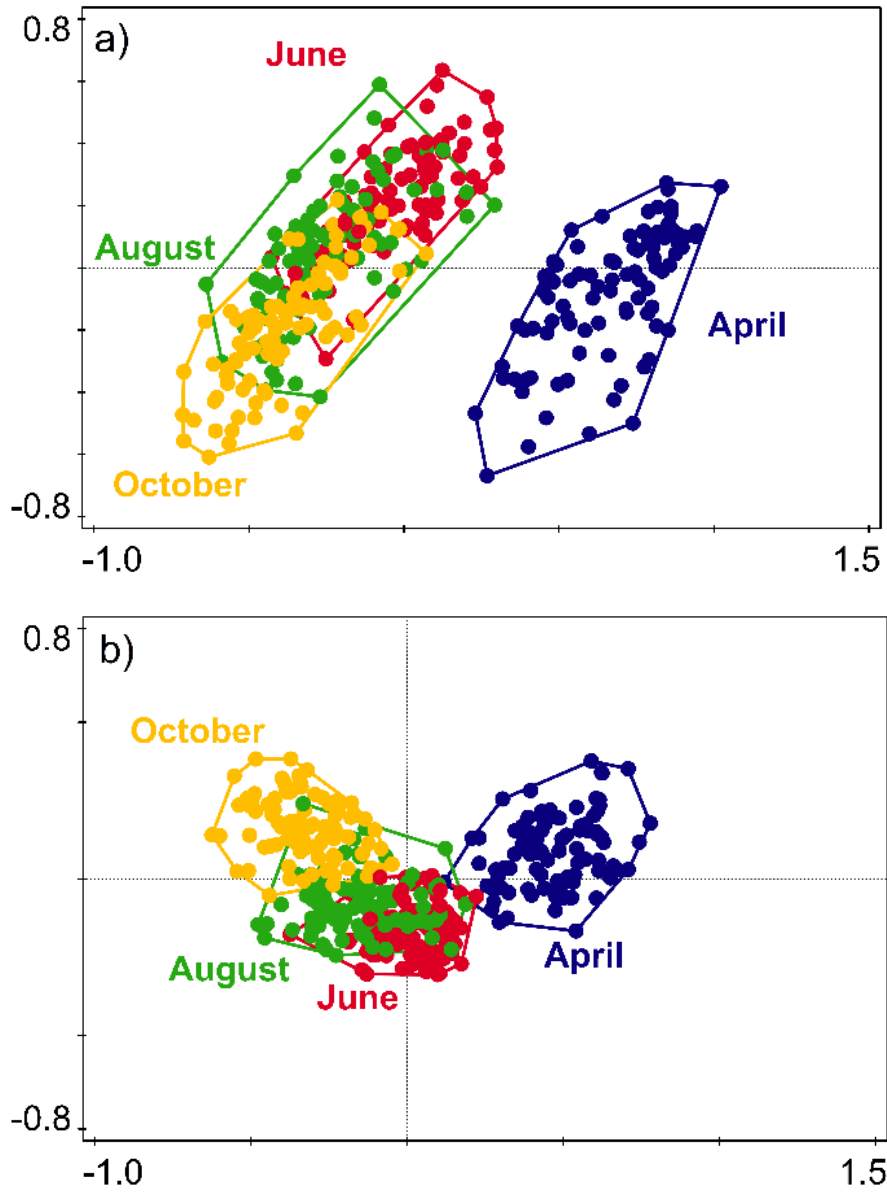

**Fig. S3.** Rarefied richness of leaf microbiota among tree species for **a)** bacteria (df = 362, F = 5.69, P < 0.001), **b)** fungi (df = 362, F = 22.65, P < 0.001) (mean  $\pm$  SE) as fitted by GLMs with Gamma distribution.

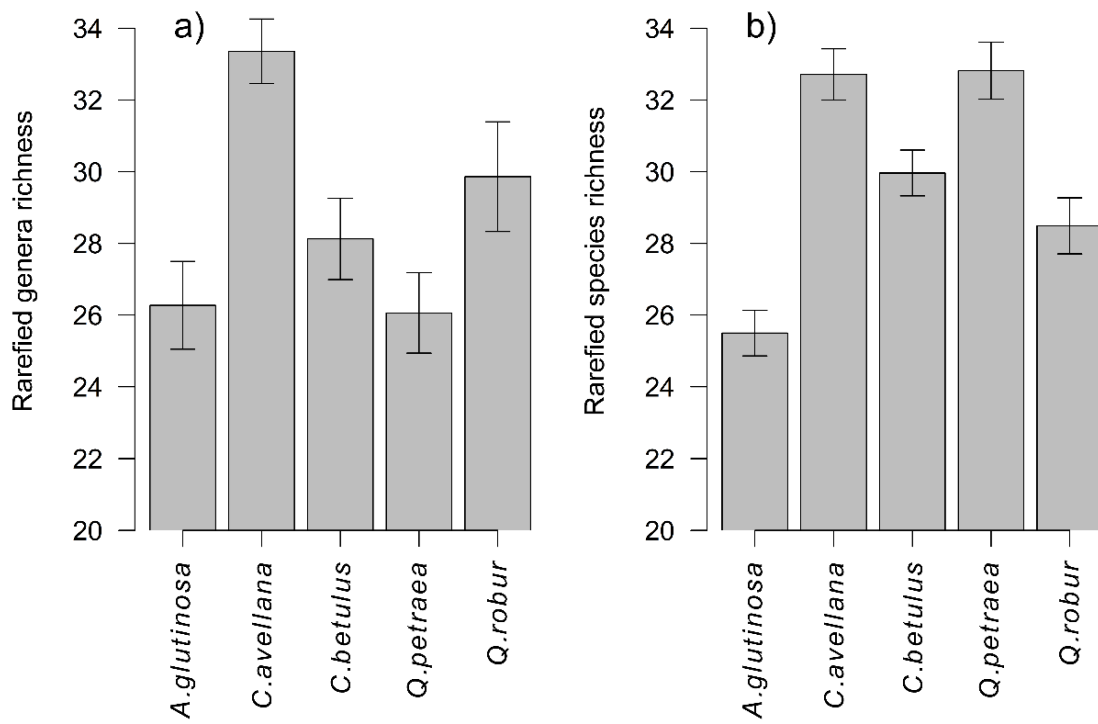

**Fig. S4.** PCoA showing shifts in composition of larval microbiota due to seasonal progression based on a) p-RDA for bacteria (df = 305, F = 9.90, P = 0.001) and b) p-CCA for fungi (df = 305, F = 20.00, P = 0.001)

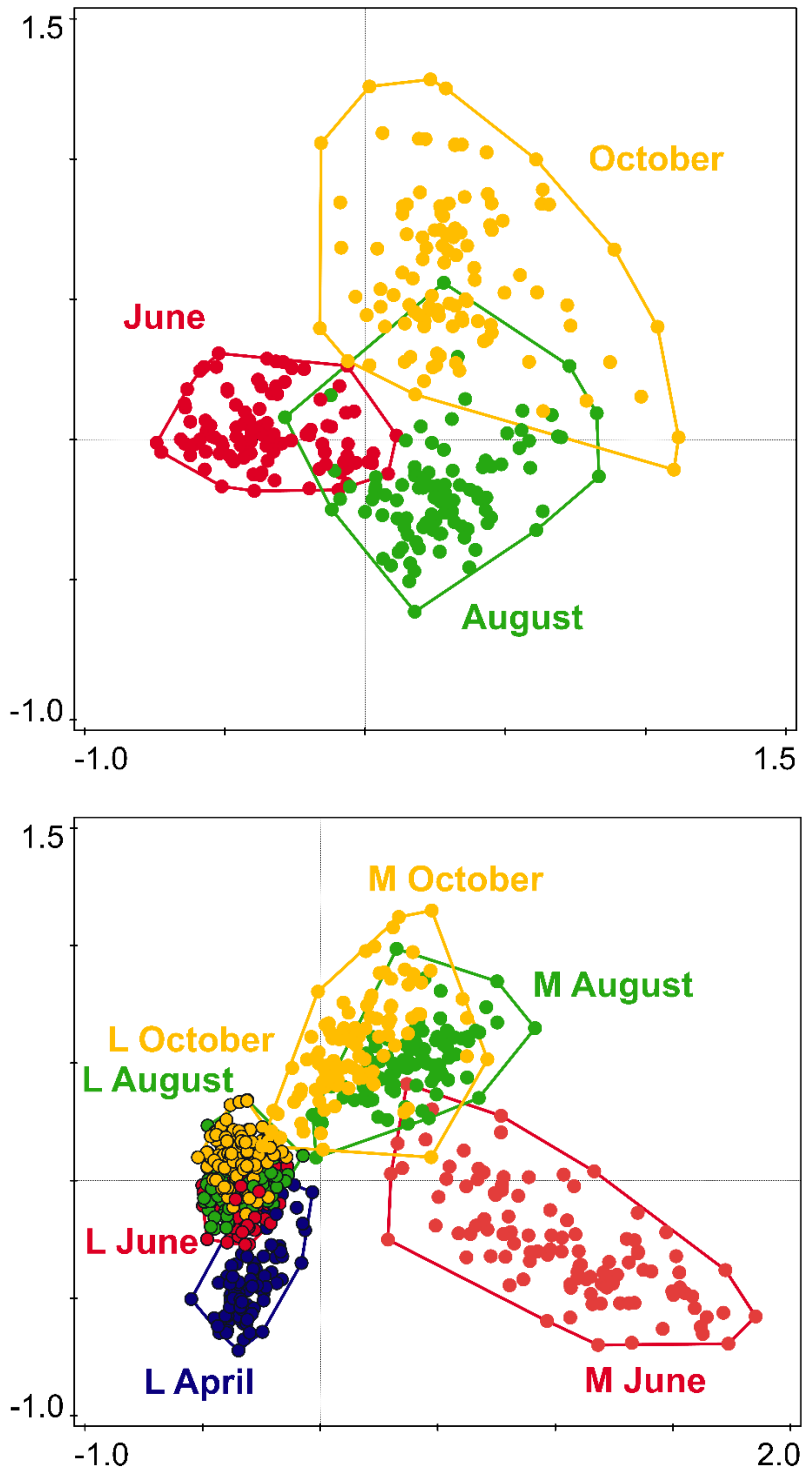

**Fig. S5.** The p-CCA showing differences in **a)** bacterial (df = 297, F = 2.30, P = 0.001), and **b)** fungal composition of larval microbiota (df = 297, F = 1.60, P = 0.001). Data for *Quercus petraea*, and *Q. robur* were merged for the purposes of this analysis

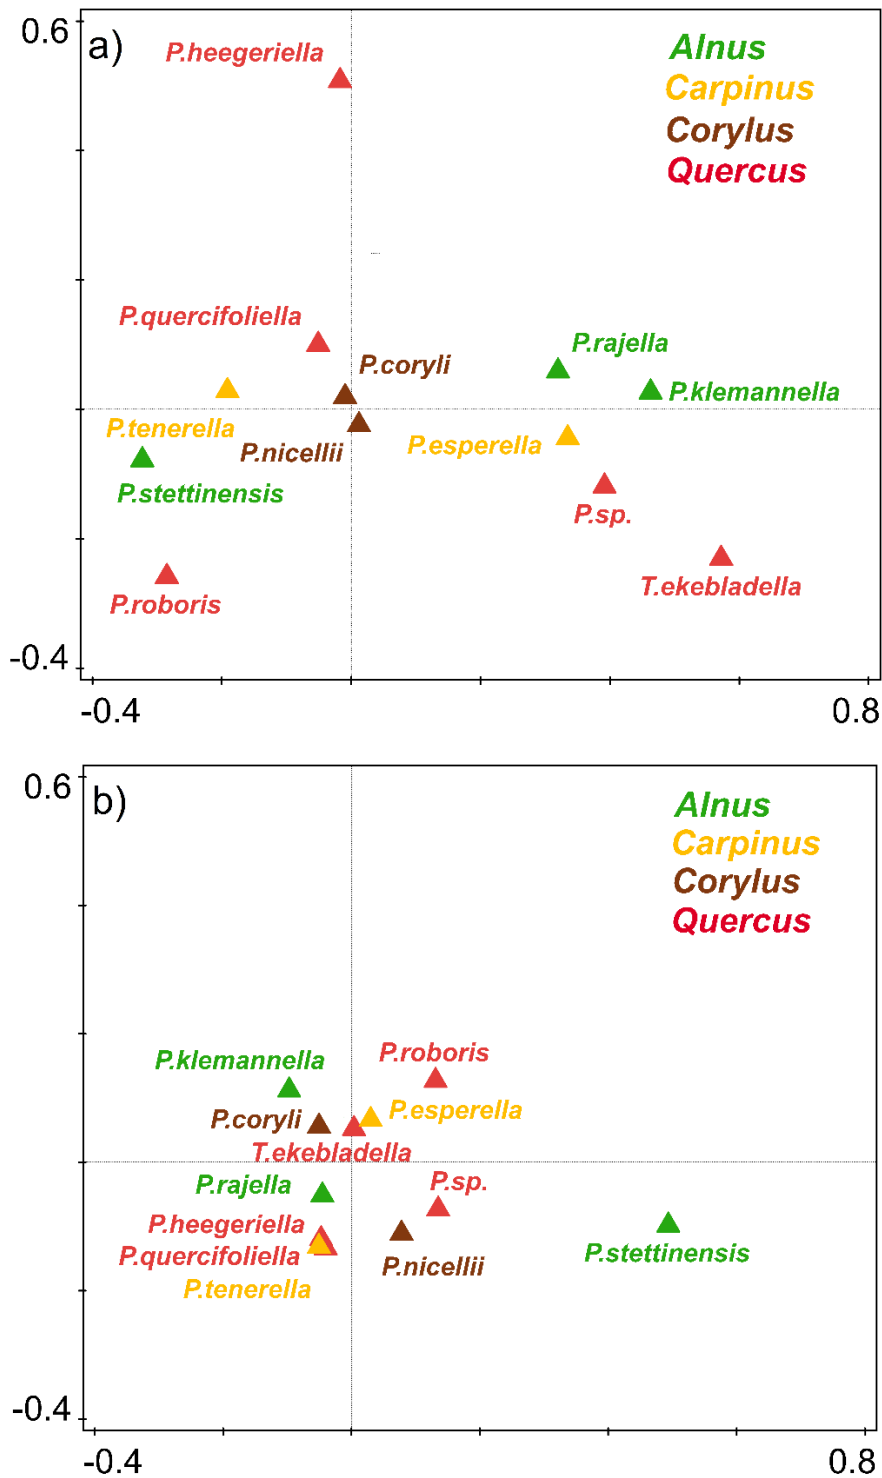



**Fig. S6.** Rarefied richness among larval species for **a)** bacteria (df = 299, F = 29.07, P < 0.001), **b)** fungi (df = 297, F = 3.91, P < 0.001) as fitted by GLM with Gamma distribution and LM, respectively

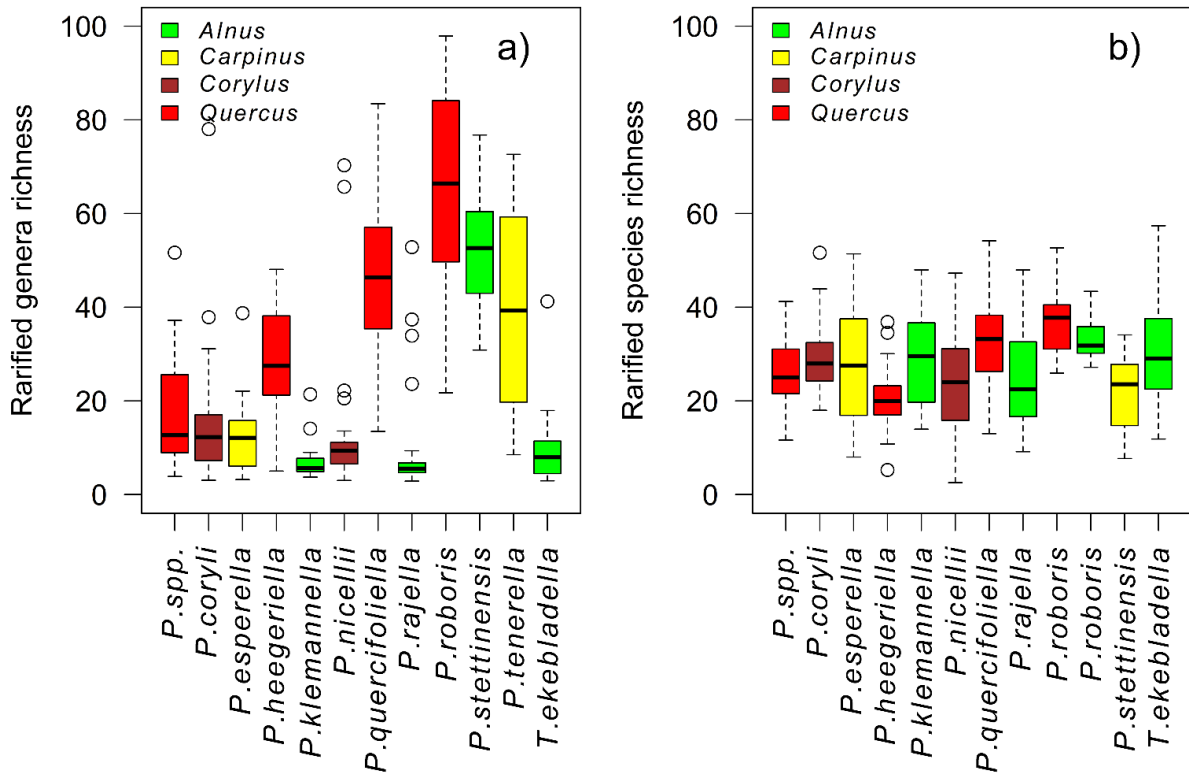

**Table S6.** Top ten bacterial genera and fungal species with identified seasonal trends.  $AIC_{\Delta}$  = difference in AIC of model based simply on differences between leaf and larval samples, and model with added seasonal trend and its interaction with sample type, Sample Type  $P_{adj}$  = adjusted p-value from analysis of deviance of the model for differences between leaf and larval samples, Sample Time  $P_{adj}$  = adjusted p-value for simple seasonal trend, Interaction  $P_{adj}$  = adjusted p-value of interaction between those explanatory variables, Frequency in dataset = Number of samples with presence of given bacteria/fungi, only samples with frequency  $\geq 100$  were used in the analysis. Taxa occurring in larvae more frequently than predicted by null models are highlighted.

| Bacterial taxon                       | $AIC_{\Delta}$ | Sample Type $P_{adj}$ | Sample Time $P_{adj}$ | Interaction $P_{adj}$ | Frequency in dataset | Prevalence environment | Potential function                                                                                                                      | Reference(s)*                                                                                               |
|---------------------------------------|----------------|-----------------------|-----------------------|-----------------------|----------------------|------------------------|-----------------------------------------------------------------------------------------------------------------------------------------|-------------------------------------------------------------------------------------------------------------|
| <i>Bacillus</i>                       | 250.54         | <0.001                | 0.200                 | <0.001                | 391                  | leaf/larva             | plants: antifungal activity, promotion of plant growth and health; larvae: proteolytic activity counteracting plant protease inhibitors | Bao et al. 2020, Nair et al. 2002, Perissol et al. 1993                                                     |
| <i>Staphylococcus</i>                 | 173.60         | <0.001                | <0.001                | <0.001                | 354                  | larva                  | plants: alleviation of biotic stresses; larvae: protease activity against plant secondary metabolites                                   | Araya et al. 2020, Visôto et al. 2009                                                                       |
| <i>Cutibacterium</i>                  | 155.71         | <0.001                | <0.001                | 0.280                 | 417                  | larva                  | common core member of arthropod guts, digestive processes in vertebrate guts (carbohydrate fermentation)                                | Kumar et al. 2020, Koskinioti et al. 2019, Papadopoulos et al. 2020, Perry & Lambert 2006, Wang et al. 2011 |
| <i>Erwinia</i>                        | 134.20         | <0.001                | <0.001                | <0.001                | 155                  | leaf                   | common colonist of leaves                                                                                                               | Rastogi et al. 2012                                                                                         |
| <i>Deinococcus</i>                    | 128.07         | <0.001                | <0.001                | <0.001                | 246                  | leaf                   | promoting plant resistance to environmental stressors (desiccation, pollution, UV radiation, etc.)                                      | Bauermeister et al. 2011, Waight et al. 2007, Díaz-Riaño et al. 2019                                        |
| P3OB-42                               | 125.85         | <0.001                | <0.001                | <0.001                | 367                  | leaf                   | suppression of phytopathogens                                                                                                           | Dobrovol'skaya et al. 2016                                                                                  |
| <i>Acinetobacter</i>                  | 114.08         | <0.001                | <0.001                | 0.228                 | 356                  | larva                  | plants: denitrification and organic pollutant degradation; larvae: metabolizing of toxic phenolic glycosides                            | Bao et al. 2020, Mason et al. 2016                                                                          |
| <i>Methylobacterium/Methylorubrum</i> | 99.39          | <0.001                | 0.317                 | <0.001                | 501                  | leaf/larva             | plants: plant-growth promotion, pathogen resistance; larvae: synthesis of amino acids, production of digestive enzymes and vitamins     | Senthilkumar et al. 2015, Ardanov et al. 2012, Jayashree et al. 2011, Martins et al. 2019                   |
| <i>Curtobacterium</i>                 | 88.61          | <0.001                | <0.001                | 0.044                 | 250                  | leaf                   | plant pathogen                                                                                                                          | Hsieh et al. 2005                                                                                           |
| <i>Streptococcus</i>                  | 88.50          | <0.001                | <0.001                | 0.001                 | 223                  | larva                  | degradation of plant secondary metabolites                                                                                              | Osawa et al. 1990, Visôto et al. 2009                                                                       |
| Fungal taxon                          | $AIC_{\Delta}$ | Sample Type $P_{adj}$ | Sample Time $P_{adj}$ | Interaction $P_{adj}$ | Frequency in dataset | Prevalence environment | Potential function                                                                                                                      | Reference (s)*                                                                                              |
| <i>Neosascochyta europaea</i>         | 226.31         | <0.001                | <0.001                | <0.001                | 154                  | larva                  | synthesis of amino acids, oxidative processes                                                                                           | Heisel et al. 2017                                                                                          |
| <i>Ampelomyces quisqualis</i>         | 132.18         | <0.001                | <0.001                | 0.001                 | 283                  | larva                  | suppression of phytopathogens                                                                                                           | Falk et al. 1995                                                                                            |

|                                    |        |        |        |        |     |            |                                                                            |                                                                |
|------------------------------------|--------|--------|--------|--------|-----|------------|----------------------------------------------------------------------------|----------------------------------------------------------------|
| <i>Curvibasidium cygneicollum</i>  | 115.27 | <0.001 | <0.001 | <0.001 | 185 | leaf/larva | plant pathogen                                                             | Robert et al. 2019                                             |
| <i>Botrytis cinerea</i>            | 106.06 | 0.999  | <0.001 | 1.000  | 133 | leaf/larva | plant pathogen, regulation of lepidopteran life cycle via sterol synthesis | Elad et al. 2016, Rizvi & Raman 2015                           |
| <i>Debaryomyces prosopidis</i>     | 101.68 | <0.001 | <0.001 | 0.685  | 123 | larva      | nutrition (carbohydrate assimilation)                                      | Wrent et al. 2014                                              |
| <i>Ceramothyrium carniolicum</i>   | 80.49  | <0.001 | <0.001 | <0.001 | 270 | larva      | plant pathogen                                                             | Nguyen et al. 2019                                             |
| <i>Mycosphaerelloides madeirae</i> | 78.91  | <0.001 | <0.001 | <0.001 | 102 | larva      | plant pathogen                                                             | Crous et al. 2004                                              |
| <i>Exobasidium arescens</i>        | 69.12  | <0.001 | <0.001 | <0.001 | 104 | leaf       | plant pathogen                                                             | Bergerow et al. 2002                                           |
| <i>Seimatosporium quercinum</i>    | 57.32  | <0.001 | <0.001 | <0.001 | 109 | leaf       | common colonist of oak twigs                                               | Goonasekara et al. 2016                                        |
| <i>Candida sake</i>                | 56.51  | <0.001 | <0.001 | 1.000  | 229 | larva      | pathogen suppression, nutrition                                            | Malassigné et al. 2021, Usall et al. 2000, Morales et al. 2008 |

\*References are listed on the following pages

## References

- Araya MA, Valenzuela T, Inostroza NG, Maruyama F, Jorquera MA, Acuña JJ. 2020. Isolation and characterization of cold-tolerant hyper-ACC-degrading bacteria from the rhizosphere, endosphere, and phyllosphere of Antarctic vascular plants. *Microorganisms* 8:1788.
- Ardanov P, Sessitsch A, Häggman H, Kozyrovska N, Pirttilä AM. 2012. *Methylobacterium*-induced endophyte community changes correspond with protection of plants against pathogen attack. *PLOS ONE* 7:e46802
- Bao L, Gu L, Sun B, Cai W, Zhang S, Zhuang G, Bai Z, Zhuang X. 2020. Seasonal variation of epiphytic bacteria in the phyllosphere of *Ginkgo biloba*, *Pinus bungeana* and *Sabina chinensis*. *FEMS Microbiol Ecol* 96:fiaa017.
- Bauermeister, A., Moeller, R., Reitz, G., Sommer, S., & Rettberg, P. (2011). Effect of relative humidity on *Deinococcus radiodurans*' resistance to prolonged desiccation, heat, ionizing, germicidal, and environmentally relevant UV radiation. *Microbial ecology*, 61(3), 715-722.
- Begerow, D., Bauer, R., & Oberwinkler, F. (2002). The Exobasidiales: an evolutionary hypothesis. *Mycological Progress*, 1(2), 187-199.
- Crous PW, Groenewald JZ, Mansilla JP, Hunter GC, Wingfield MJ (2004). Phylogenetic reassessment of *Mycosphaerella* spp. and their anamorphs occurring on *Eucalyptus*. 1. *Stud Mycol* 50:195–214
- Díaz-Riaño J, Posada L, Acosta IC, Ruíz-Pérez C, García-Castillo C, Reyes A, Zambrano MM. 2019. Computational search for UV radiation resistance strategies in *Deinococcus swuensis* isolated from Paramo ecosystems. *PLOS ONE* 14:e0221540.
- Dobrovol'skaya TG, Khusnetdinova KA, Manucharova NA, Balabko PN. 2016. The structure and functions of bacterial communities in an agrocenosis. *Eurasian Soil Sci* 49:70–76
- Elad Y, Vivier M, Fillinger S. 2016. Botrytis, the Good, the Bad and the Ugly, p. 1–15. In Fillinger, S, Elad, Y (eds.), *Botrytis – the Fungus, the Pathogen and its Management in Agricultural Systems*. Springer International Publishing, Cham
- Falk SP, Gadoury DM, Cortesi P, Pearson RC, Seem RC. 1995. Parasitism of *Uncinula necator* cleistothecia by the mycoparasite *Ampelomyces quisqualis*. *Phytopathology* 85:794–800.
- Goonasekara I, Maharachchikumbura S, Wijayawardene N, Phookamsak R, Schumacher R, Bahkali A, Jones E, Hyde K. (2016). *Seimatosporium quercina* sp. nov. (Discosiales) on *Quercus robur* from Germany. *Phytotaxa* 255:240–248
- Heisel T, Montassier E, Johnson A, Al-Ghalith G, Lin Y-W, Wei L-N, Knights D, Gale CA. 2017. High-fat diet changes fungal microbiomes and interkingdom relationships in the murine gut. *mSphere* 2:e00351-17
- Hsieh TF, Huang HC, Mündel H-H, Conner RL, Erickson RS, Balasubramanian PM. 2005. Resistance of common bean (*Phaseolus vulgaris*) to bacterial Wilt Caused by *Curtobacterium flaccumfaciens* pv. *flaccumfaciens*. *J Phytopathol* 153:245–249
- Jayashree S, Lalitha R, Vadivukkarasi P, Kato Y, Seshadri S. 2011. Cellulase production by pink pigmented facultative methylotrophic strains (PPFMs). *Appl Biochem Biotechnol* 164:666–680
- Koskinioti, P., Ras, E., Augustinos, A. A., Tsiamis, G., Beukeboom, L. W., Caceres, C., & Bourtzis, K. (2019). The effects of geographic origin and antibiotic treatment on the gut symbiotic communities of *Bactrocera oleae* populations. *Entomologia Experimentalis et Applicata*, 167(3), 197-208.
- Kumar, V., Tyagi, I., Tyagi, K., & Chandra, K. (2020). Diversity and structure of bacterial communities in the gut of spider: Thomisidae and Oxyopidae. *Frontiers in Ecology and Evolution*, 8, 588102.
- Malassigné, S., Minard, G., Vallon, L., Martin, E., Valiente Moro, C., & Luis, P. (2021). Diversity and functions of yeast communities associated with insects. *Microorganisms*, 9(8), 1552.
- Martins AM, Latham JA, Martel PJ, Barr I, Iavarone AT, Klinman JP. 2019. A two-component protease in *Methylorubrum extorquens* with high activity toward the peptide precursor of the redox cofactor pyrroloquinoline quinone. *J Biol Chem* 294:15025–15036
- Mason CJ, Lowe-Power TM, Rubert-Nason KF, Lindroth RL, Raffa KF. 2016. Interactions between bacteria and aspen defense chemicals at the phyllosphere–herbivore interface. *J Chem Ecol* 42:193–201

- Morales, H., Sanchis, V., Usall, J., Ramos, A. J., & Marín, S. (2008). Effect of biocontrol agents *Candida sake* and *Pantoea agglomerans* on *Penicillium expansum* growth and patulin accumulation in apples. *International journal of food microbiology*, 122(1-2), 61-67
- Nair J r., Singh G, Sekar V. 2002. Isolation and characterization of a novel *Bacillus* strain from coffee phyllosphere showing antifungal activity. *J Appl Microbiol* 93:772–780.
- Nguyen D, Boberg J, Ihrmark K, Stenström E, Stenlid J. 2016. Do foliar fungal communities of Norway spruce shift along a tree species diversity gradient in mature European forests? *Fungal Ecol* 23:97–108
- Osawa R, Mitsuoka T. 1990. Selective medium for enumeration of tannin-protein complex-degrading *Streptococcus* spp. in feces of koalas. *Appl Environ Microbiol* 56:3609–3611.
- Papadopoulos, C., Karas, P. A., Vasileiadis, S., Ligda, P., Saratsis, A., Sotiraki, S., & Karpouzias, D. G. (2020). Host species determines the composition of the prokaryotic microbiota in *Phlebotomus* sandflies. *Pathogens*, 9(6), 428.
- Perissol C, Roux M, Le Petit J. 1993. Succession of bacteria attached to evergreen oak leaf surfaces [phylloplane]. *Eur J Soil Biol* 29:167–176.
- Perry, A. L., and Lambert, P. A. (2006). *Propionibacterium acnes*. *Lett. Appl. Microbiol.* 42, 185–188. doi: 10.1111/j.1472-765X.2006.01866.x
- Rastogi G, Sbodio A, Tech JJ, Suslow TV, Coaker GL, Leveau JHJ. 2012. Leaf microbiota in an agroecosystem: spatiotemporal variation in bacterial community composition on field-grown lettuce. *10. ISME J* 6:1812–1822.
- Rizvi SZM, Raman A. 2015. Epiphyas postvittana (Lepidoptera: Tortricidae)—*Botrytis cinerea* (Helotiales: Sclerotiniaceae)—*Vitis vinifera* (Vitales: Vitaceae) interaction: the role of *B. cinerea* on the development of *E. postvittana* in synthetic nutritional media. *J Econ Entomol* 108:1646–1654
- Robert K, Baranowska M, Behnke-Borowczyk J. 2019. The effect of size of black cherry stumps on the composition of fungal communities colonising stumps. *Open Life Sci* 14:482–493
- Senthilkumar M, Madhaiyan M, Sundaram SP, Kannaiyan S. 2009. Intercellular colonization and growth promoting effects of *Methylobacterium* sp. with plant-growth regulators on rice (*Oryza sativa* L. Cv CO-43). *Microbiol Res* 164:92–104
- Usall, J., Teixidó, N., Fons, E., & Vinas, I. (2000). Biological control of blue mould on apple by a strain of *Candida sake* under several controlled atmosphere conditions. *International Journal of Food Microbiology*, 58(1-2), 83-92
- Visôto LE, Oliveira MGA, Ribon AOB, Mares-Guia TR, Guedes RNC. 2009. Characterization and identification of proteolytic bacteria from the gut of the velvetbean caterpillar (Lepidoptera: Noctuidae). *Environ Entomol* 38:1078–1085.
- Waight K, Pinyakong O, Luepromchai E. 2007. Degradation of phenanthrene on plant leaves by phyllosphere bacteria. *J Gen Appl Microbiol* 53:265–272.
- Wang, Y., Gilbreath, T. M., Kukutla, P., Yan, G., and Xu, J. (2011). Dynamic gut microbiome across life history of the malaria mosquito *Anopheles gambiae* in Kenya. *PLoS One* 6:e24767. doi: 10.1371/journal.pone.024767
- Wrent, P., Rivas, E.M., Gil de Prado, E., Peinado, J.M., de Silóniz, M.I., 2014. *Debaryomyces*, in: Batt, C.A., Tortorello, M.L. (Eds.), *Encyclopedia of Food Microbiology* (Second Edition). Academic Press, Oxford, pp. 563–570. <https://doi.org/10.1016/B978-0-12-384730-0.00081-1>
